# Supplementary material for: One-step synthesis of SnOx nanocrystalline aggregates encapsulated by amorphous TiO2 as an anode in Li-ion battery
Source: Royal Society of Chemistry journal article supplement (doi:10.1039/c5ta01106j), 2015-01-01
Supplement: c5ta01106j1.pdf [file c5ta01106j1.pdf]

## Electronic Supplementary Information

# One-step synthesis of SnO<sub>x</sub> nanocrystalline aggregates encapsulated by amorphous TiO<sub>2</sub> as anode in Li-ion battery

Xiaoyu Hou,<sup>a</sup> Yanjie Hu,<sup>\*a</sup> Hao Jiang,<sup>a</sup> Yunfeng Li,<sup>b</sup> Wenge Li<sup>a</sup> and Chunzhong Li<sup>\*a</sup>

<sup>a</sup> Key Laboratory for Ultrafine Materials of Ministry of Education, School of Materials Science and  
Engineering, East China University of Science & Technology, Shanghai 200237, China

<sup>b</sup> Shanghai Nanotechnology Promotion Center, Shanghai 200237, China

\*To whom correspondence should be addressed.

E-mail: [czli@ecust.edu.cn](mailto:czli@ecust.edu.cn) (Prof. C. Z. Li) and [huyanjie@ecust.edu.cn](mailto:huyanjie@ecust.edu.cn) (Dr. Y. J. Hu)

Fax: +86 21 64250624; Tel: 86- 21- 6425- 0949;

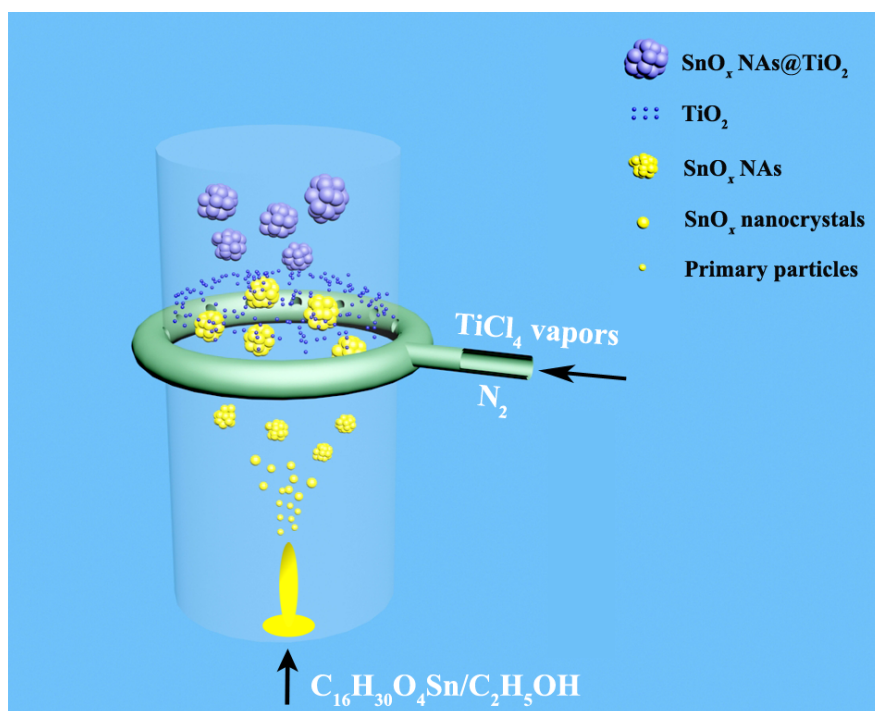

**Figure S1** Schematic diagram of FSP process for SnO<sub>x</sub> NAs@TiO<sub>2</sub>.

The FSP process includes two parts: flame synthesis of SnO<sub>x</sub> NAs and then in situ encapsulation of TiO<sub>2</sub> on fresh SnO<sub>x</sub> NAs. The tin source dissolved in the ethanol had been sprayed into flame and decomposed into primary particles, grown into SnO<sub>x</sub> nanocrystallines and aggregated into aggregations owing to the unique characteristics of FSP. The TiCl<sub>4</sub> vapors were introduced through the quenching ring with the acid of carrying N<sub>2</sub> gas. Then the TiCl<sub>4</sub> hydrolyzed into TiO<sub>2</sub> and heterogeneously nucleated on the surface of SnO<sub>x</sub> NAs, finally forming the core-shell structure of SnO<sub>x</sub> NAs@TiO<sub>2</sub>.

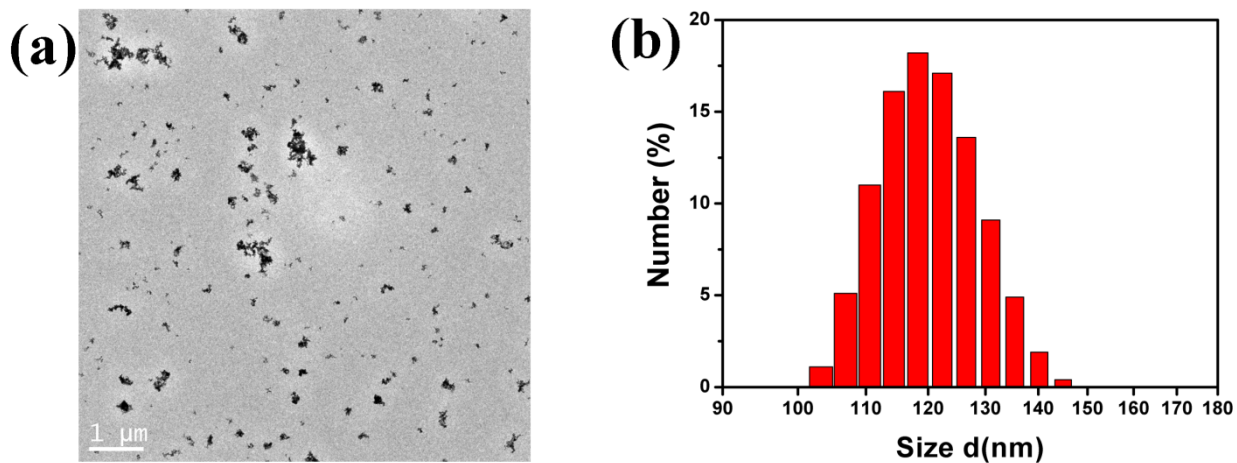

Figure S2 (a) TEM image and (b) particle size distribution of SnO<sub>x</sub> NAs@TiO<sub>2</sub>

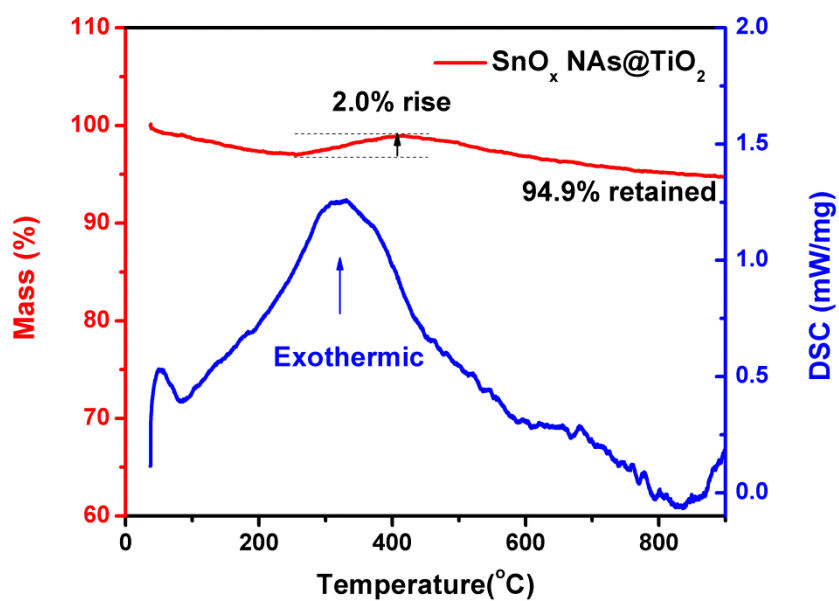

Figure S3 TGA and DSC curves of SnO<sub>x</sub> NAs@TiO<sub>2</sub>

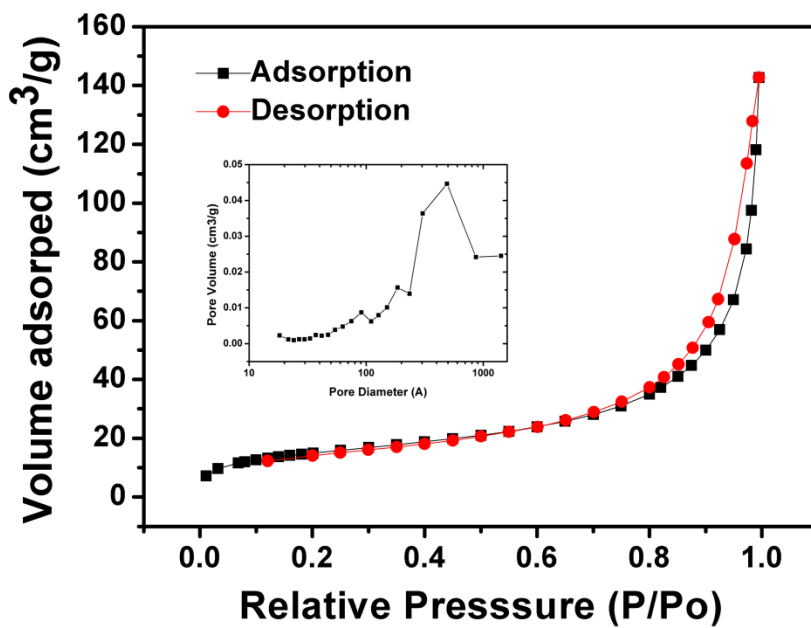

Figure S4. BET of SnO<sub>x</sub> NAs@TiO<sub>2</sub> (inset of Pore volume/diameter)

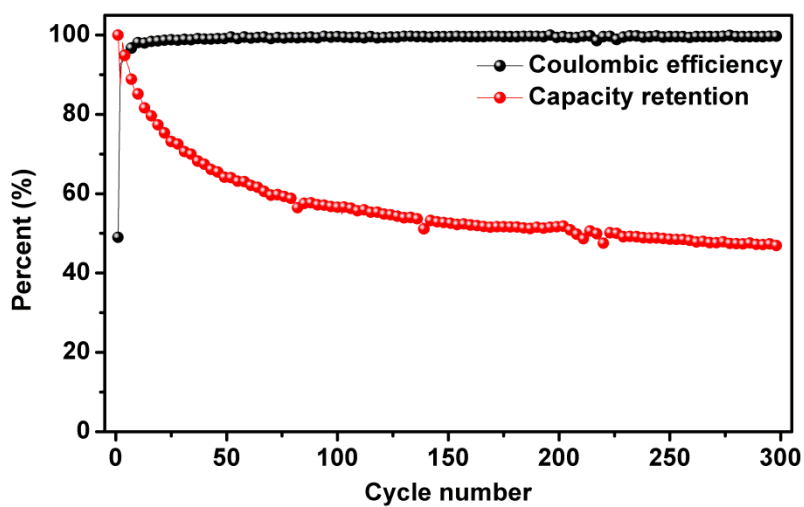

Figure S5. Coulomb efficiency and capacity retention of SnO<sub>x</sub> NAs@TiO<sub>2</sub> electrode

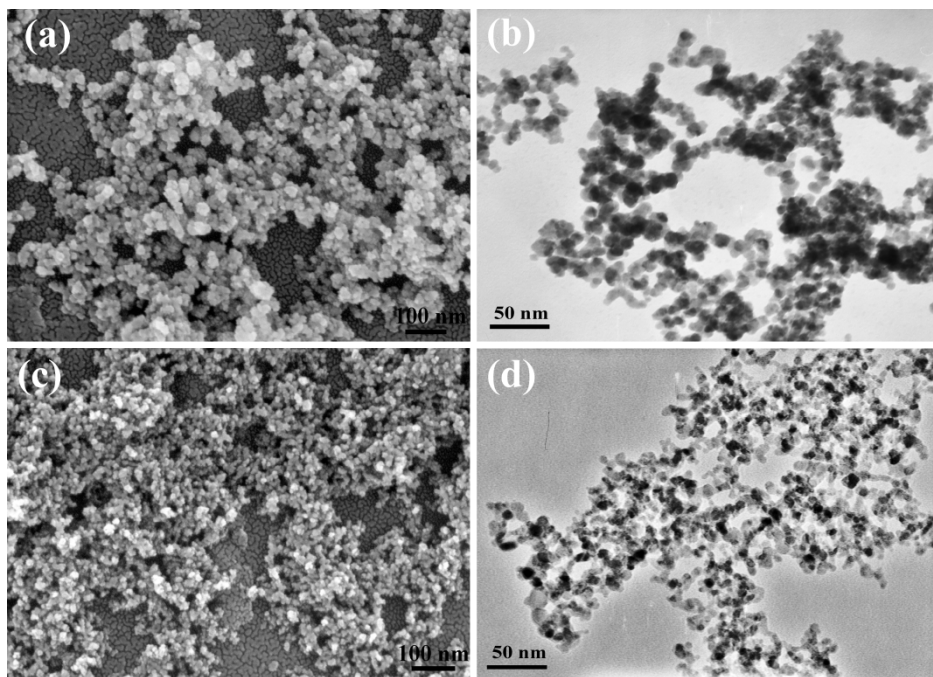

**Figure S6.** SEM and TEM images of as-prepared SnO<sub>x</sub> NAs (a,b) and TiO<sub>2</sub> NAs (c,d)

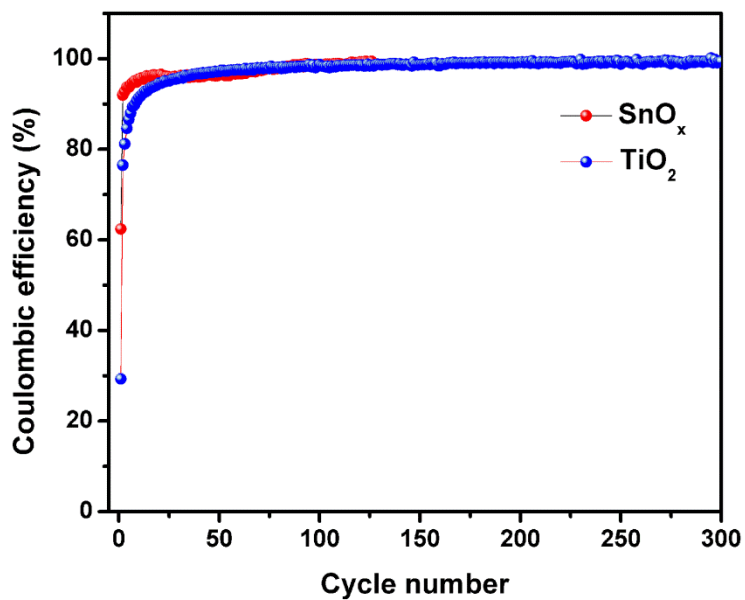

**Figure S7.** Coulomb efficiency of SnO<sub>x</sub> NAs and TiO<sub>2</sub> NAs electrodes.

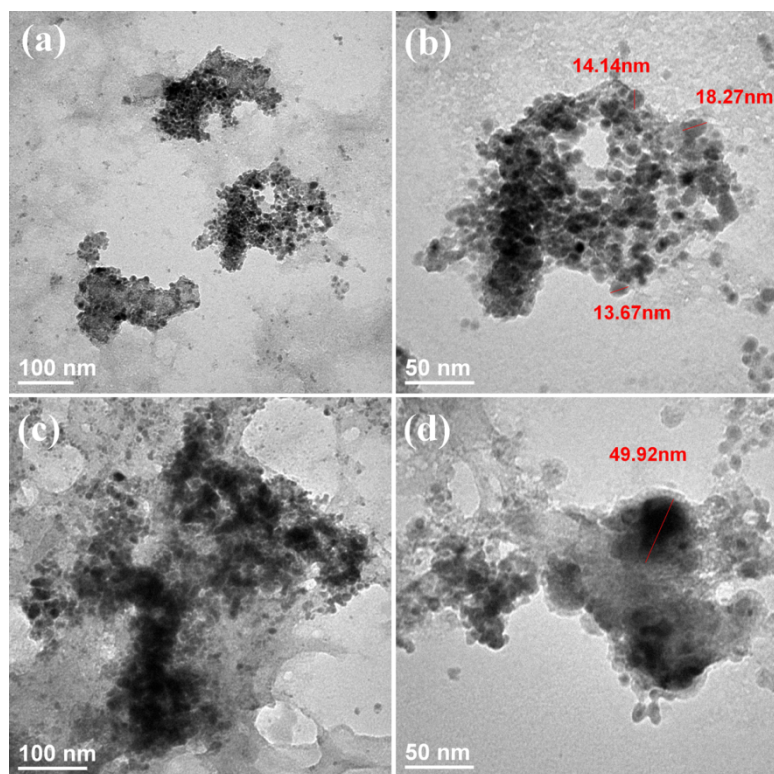

**Fig. S8** TEM images of SnO<sub>x</sub> NAs@TiO<sub>2</sub> (a,b) and SnO<sub>x</sub> NAs (c,d) after 50 cycles, respectively.
